# Supplementary material
Source: HighWire-hosted journal article supplement (http://rc.rcjournal.com/highwire/filestream/28212/field_highwire_adjunct_files/2/rc-11698-File007.docx)
Supplement: rc-11698-File007.docx [file rc-11698-File007.docx]

| Encounter characteristics | Overall Cases  *n* = 86,852 | Yes, HA-VTE  *n* = 1,580 1.8% | No, HA-VTE  *n* = 85,272  98.2% | *p* |
| --- | --- | --- | --- | --- |
| Sex assigned at birth, *n (%)*  Female  Male | 37,559 (43.2)  49,283 (56.7) | 734 (46.5)  846 (53.5) | 36,825 (43.2)  48,437 (56.8) | 0.031 |
| Race categories, *n (%)*  American Indian or Alaska Native  Asian  Asian/Indian/Pacific Islander  Black/African American  Hispanic or Latino  Native Hawaiian / Pacific Islander  Other/Mixed  Unspecified  White  Not Collected | 950 (1.1)  2,258 (2.6)  723 (0.8)  15,648 (18.0)  10,221 (11.8)  367 (0.4)  6,687 (7.7)  4,155 (4.8)  36,894 (42.5)  8,949 (10.3) | 7 (0.4)  62 (3.9)  9 (0.6)  285 (18.0)  144 (9.1)  13 (0.8)  139 (8.8)  70 (4.4)  762 (48.2)  89 (5.6) | 943 (1.1)  2,196 (2.6)  714 (0.8)  15,363 (18.0)  10,077 (11.8)  354 (0.4)  6,548 (7.7)  4,085 (4.8)  36,132 (42.4)  8,860 (10.4) | <0.001 |
| Hispanic or Latino, *n (%)* | 5,675 (6.5) | 125 (7.9) | 5,550 (6.5) | <0.001 |
| Pediatric age group, *n (%)*  Infant: 30 days to < 1 year  Child: 1 year to < 12 years  Adolescent: 12 years to < 18 years | 27,913 (32.1)  40,345 (46.5)  18,594 (21.4) | 561 (35.5)  596 (37.7)  423 (26.8) | 27,352 (32.1)  39,749 (46.6)  18,171 (21.3) | <0.001 |
| Institution region, *n (%)*  North American, non-US (*n* = 4)  Midwest (*n* = 33)  Northeast (*n* = 15)  South (*n* = 42)  West (*n* = 48) | 2,377 (2.7)  24,234 (27.9)  6,715 (7.7)  30,084 (34.6)  23,442 (27.0) | 8 (0.5)  512 (32.4)  207 (13.1)  488 (30.9)  365 (23.1) | 2,369 (2.8)  23,722 (27.8)  6,508 (7.6)  29,596 (34.7)  23,077 (27.1) | <0.001 |
| Institution size (by tertile), *n (%)*  Small (*n* = 48 centers)  Medium (*n* = 47 units)  Large (*n* = 47 centers) | 5,746 (6.6)  21,083 (24.3)  60,023 (69.1) | 80 (5.1)  312 (19.8)  1,188 (75.2) | 5,666 (6.6)  20,771 (24.4)  58,835 (69.0) | <0.001 |

**Supplemental Table 3**. General demographic data among children with exposure to invasive mechanical ventilation compared by development of hospital acquired venous thromboembolism. [HA-VTE: hospital-acquired venous thromboembolism; US: United States]
